# Supplementary material
Source: Springer Nature journal article supplement (https://www.springermedizin.de/resource/supplementary/13229_2013_105_MOESM16_ESM.pdf/9676270)

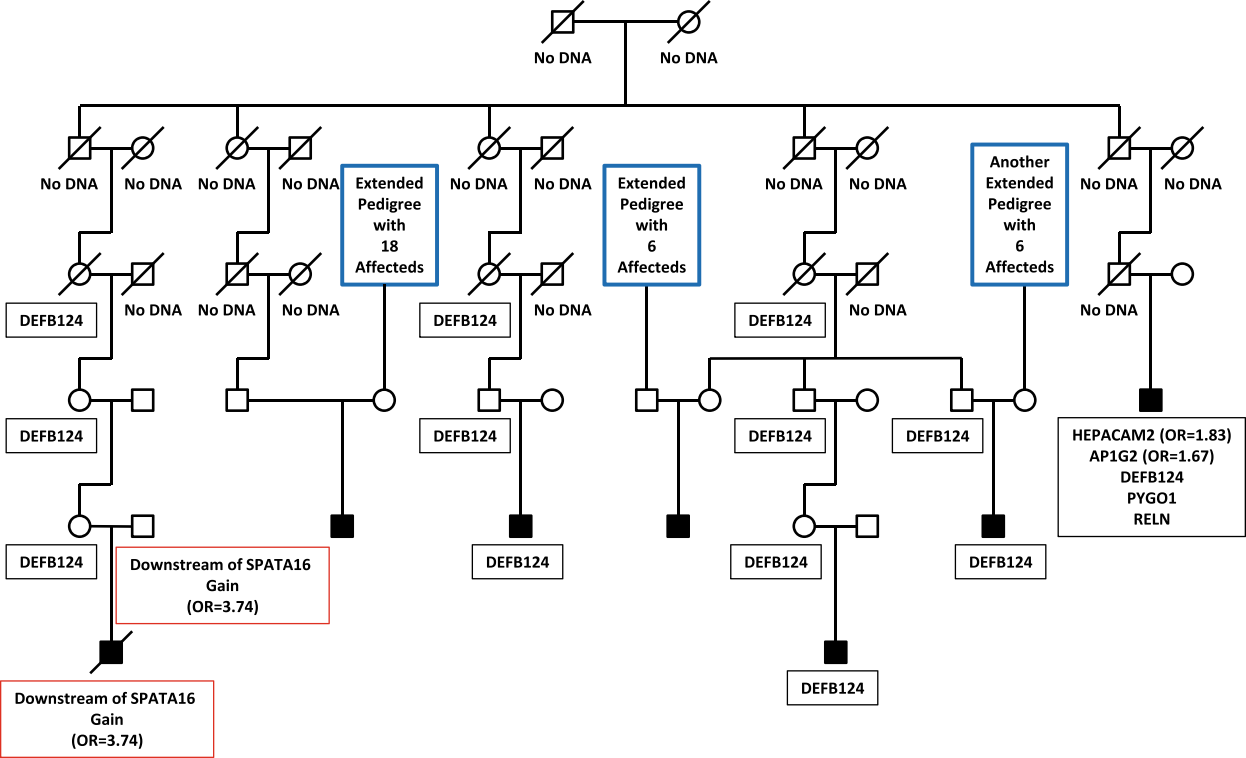

Supplement: MOESM16 [file 9676270]
